# Supplementary material
Source: publisher figshare collection journal article supplement (https://tandf.figshare.com/ndownloader/files/21843468)
Supplement: Supplementary file 1 [file 21843468]

## Urea Loaded Hydroxyapatite Nanocarrier for Efficient Delivery of Plant Nutrients in Rice

Saheli Pradhan, Maheshwar Durgam and Damodhara Rao Mailapalli

### Supporting Information

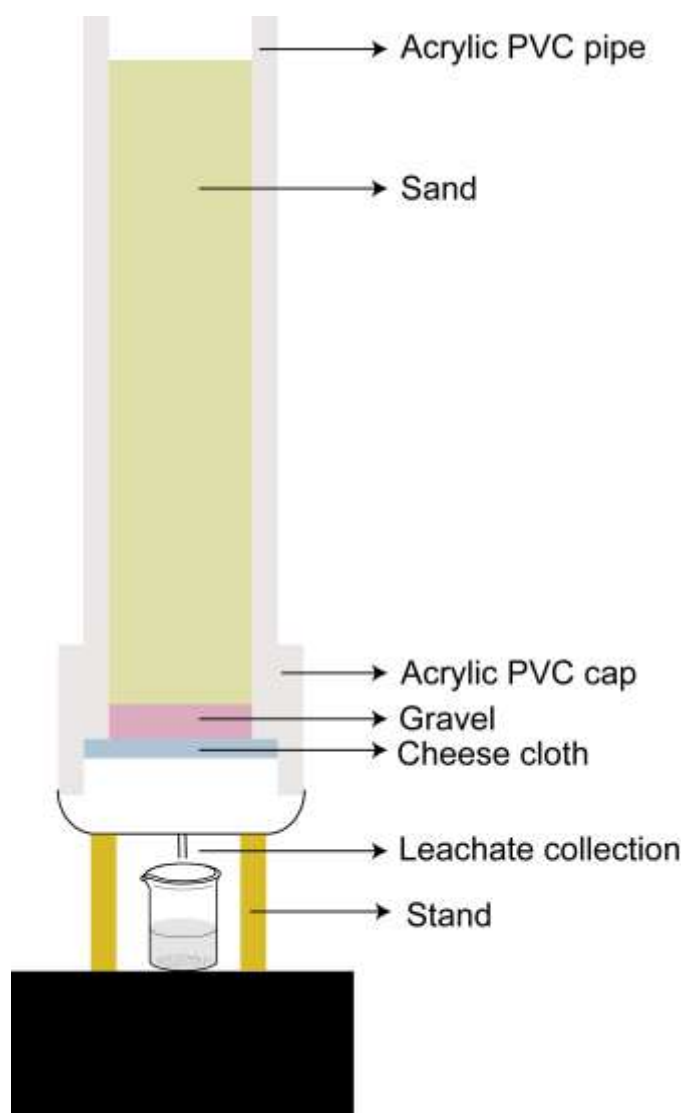

**Figure S1.** Schematic representation of sand column design. The inner diameter of the sand column is 4.5 cm and height 50 cm; 9 similar columns were used for the study.

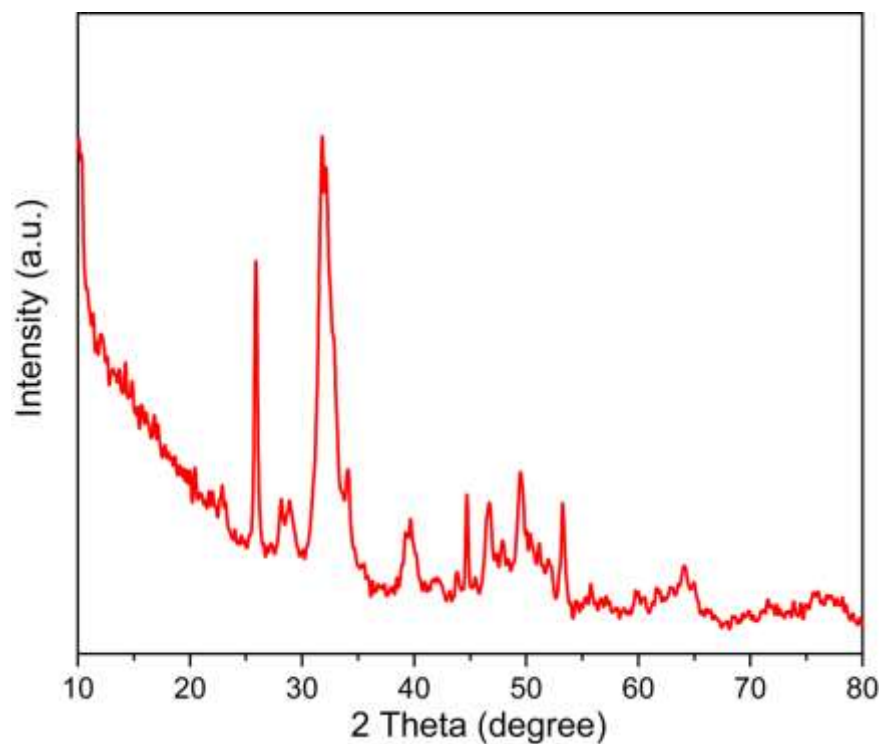

**Figure S2.** PXRD pattern of HANP showing its crystalline nature.

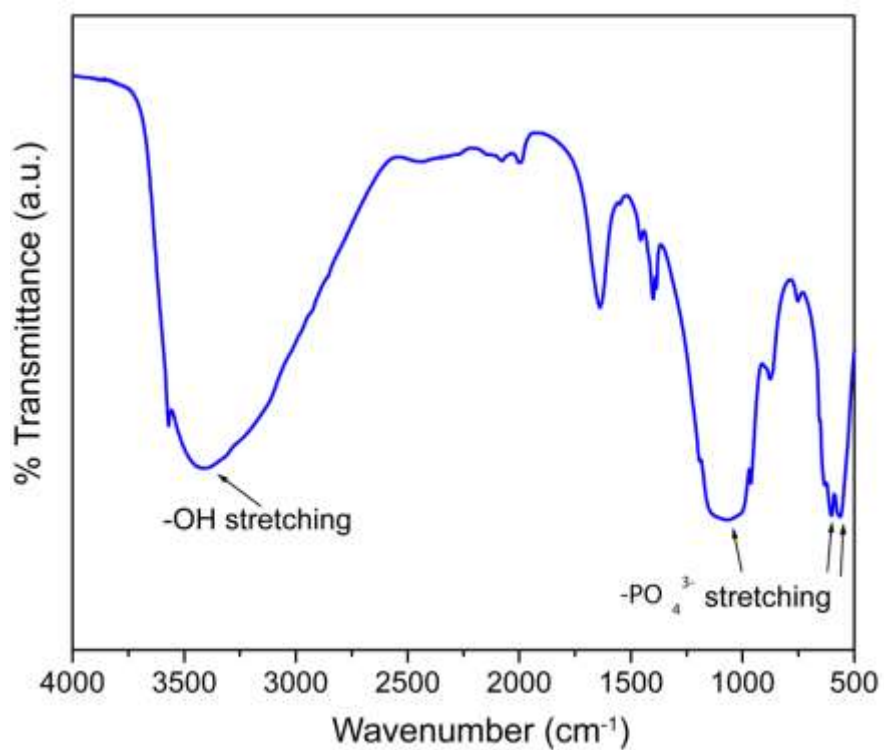

**Figure S3.** FTIR spectra of HANP shows its characteristic –OH and PO<sub>4</sub><sup>3-</sup> stretching frequency. Presence of hydroxyl group also confirmed its hydrophilic nature.

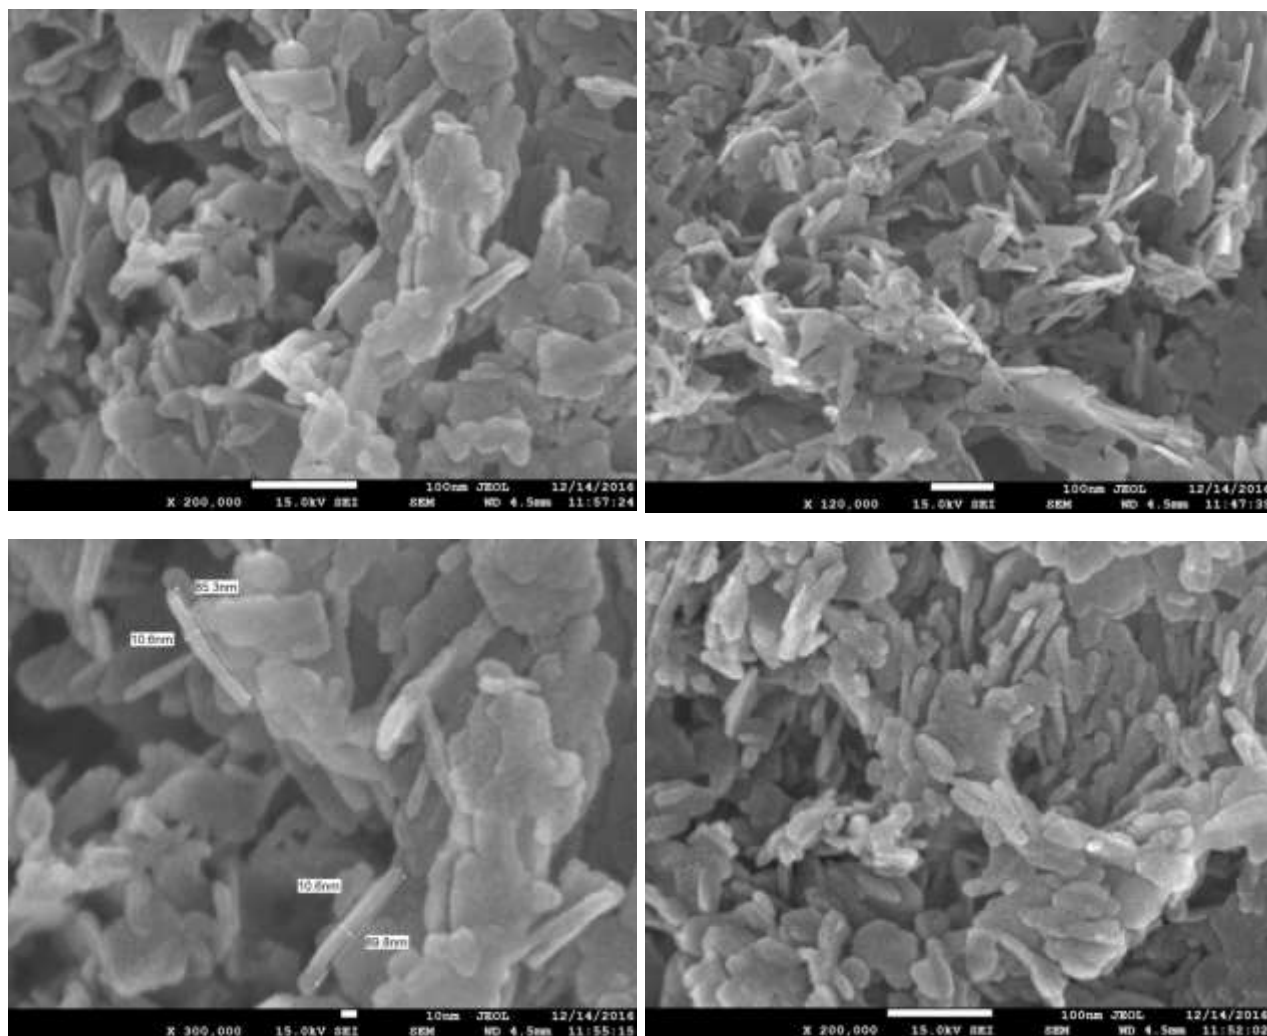

**Figure S4.** FESEM image of HANP which demonstrates its rod like morphology.

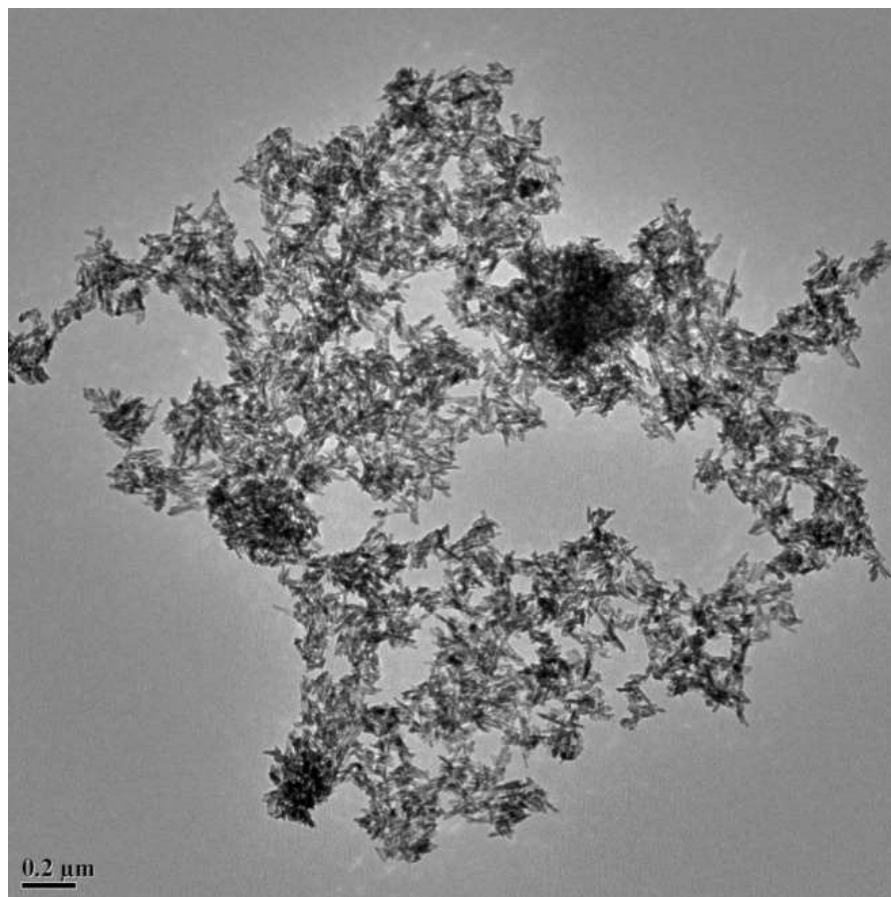

**Figure S5.** TEM image of HANP.

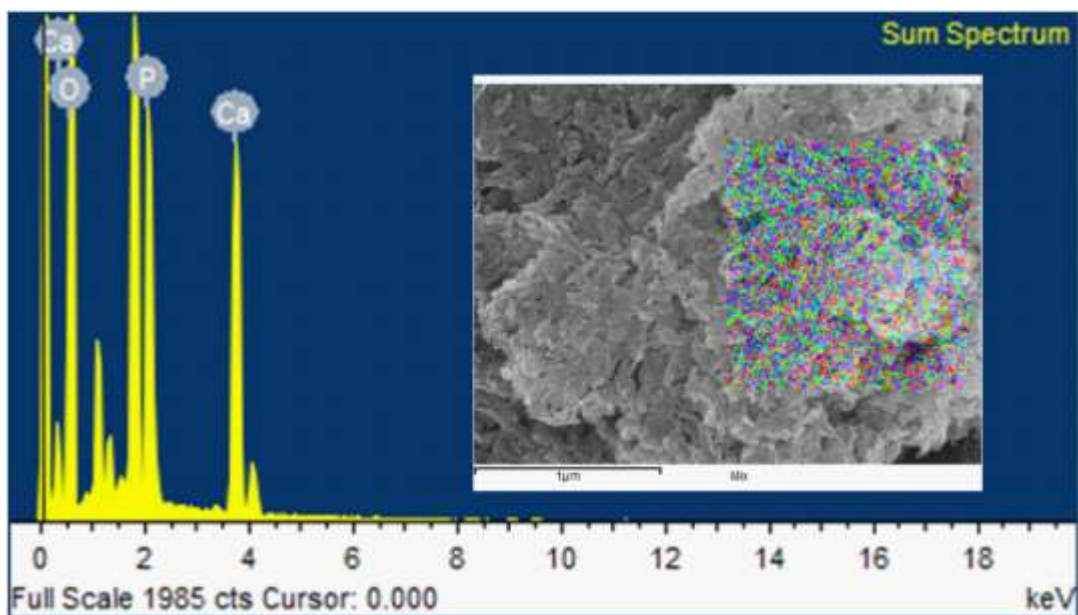

**Figure S6.** EDX analysis of HANP which shows Ca, O and P are the major chemical constituents, even no trace of N was detected.

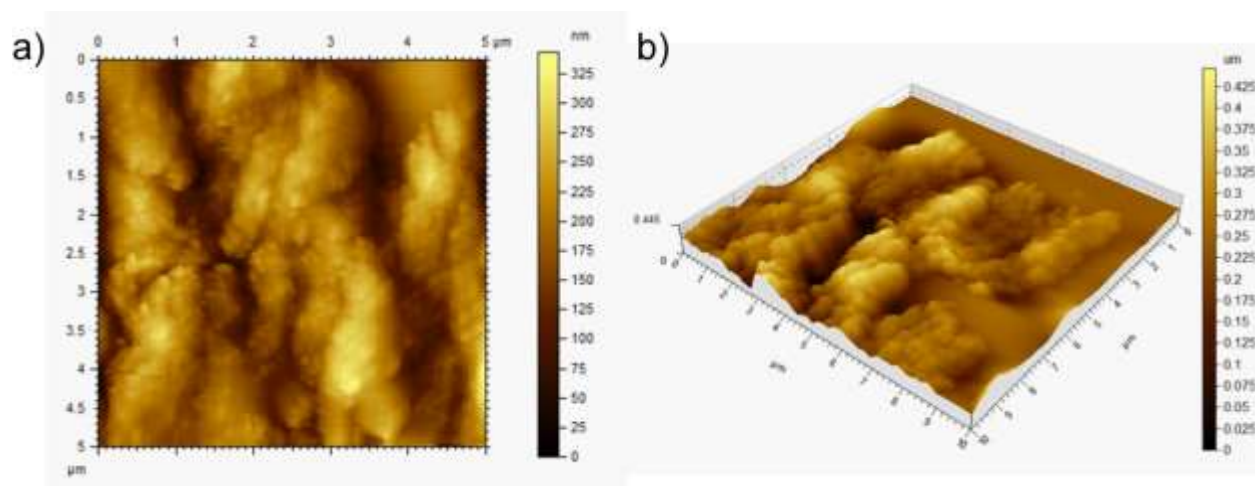

**Figure S7.** AFM image of HANP; (a) 2D height profile, (b) 3D height profile. Average height profile is found to be 42 nm.

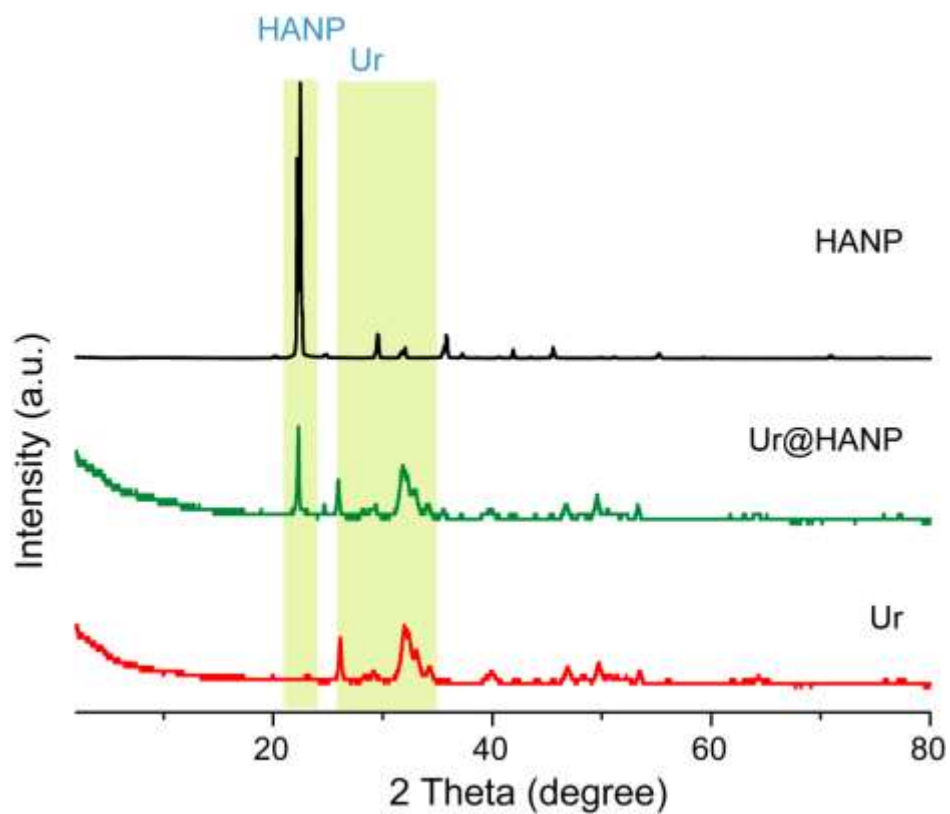

**Figure S8.** Comparison of PXRD pattern between HANP, Urea and Ur@HANP. In Ur@HANP characteristic Ur and HANP crystalline peak is well retained.

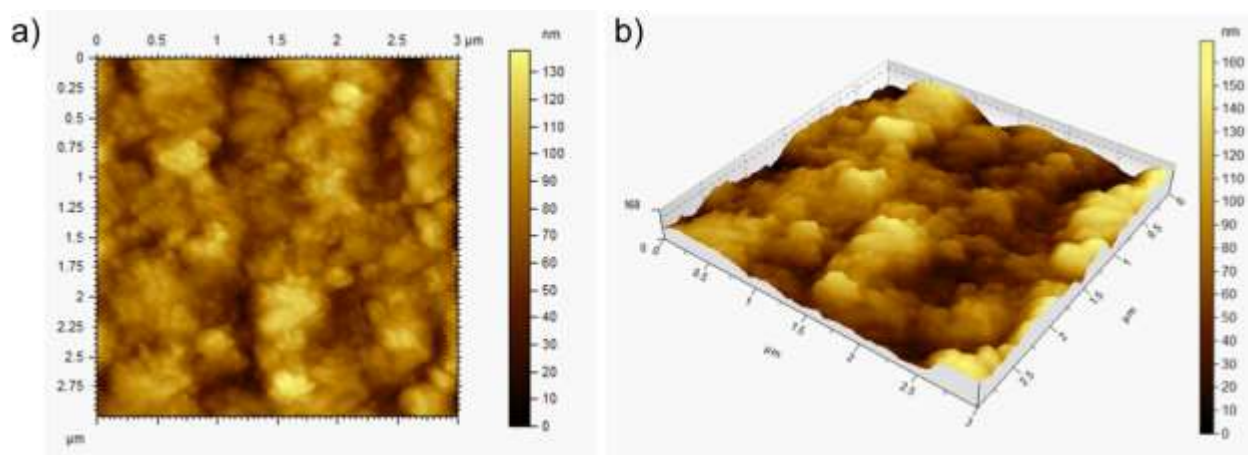

**Figure S9.** AFM image of Ur@HANP; (a) 2D height profile and (b) 3D height profile; morphological integrity was retained even after loading of urea on to it.



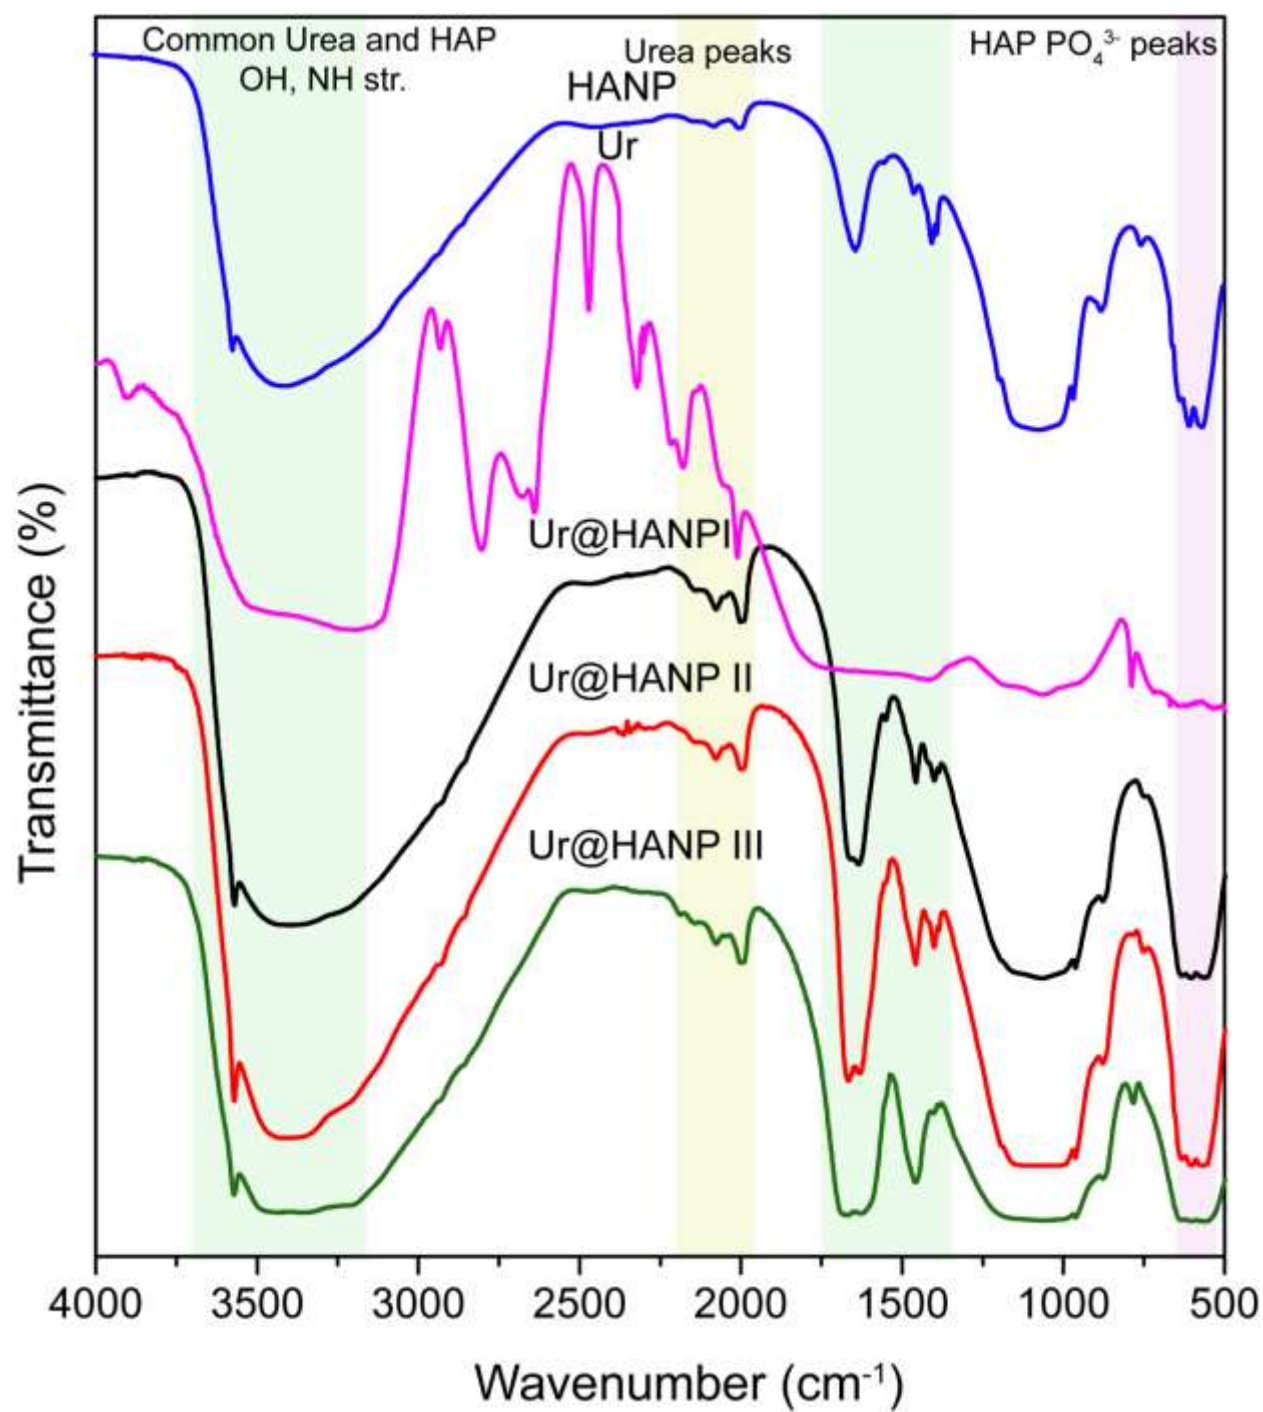

**Figure S10.** Comparison of FTIR spectra between HANP, Urea and Ur@HANP (three different sets). FTIR spectra of Ur@HANP shows characteristic stretching frequency of HANP and urea.

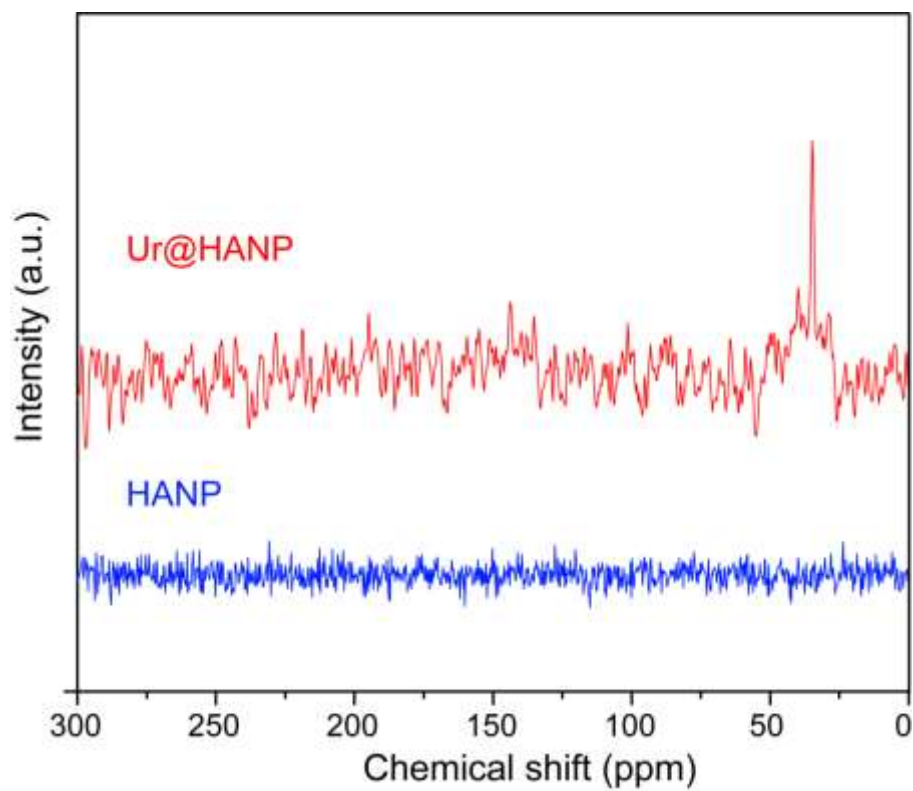

**Figure S11.** Comparison of solid state CP MAS  $^{15}\text{N}$  NMR between HANP and Ur@HANP. HANP is  $^{15}\text{N}$  NMR silent, meanwhile Ur@ HANP shows characteristic urea peak.



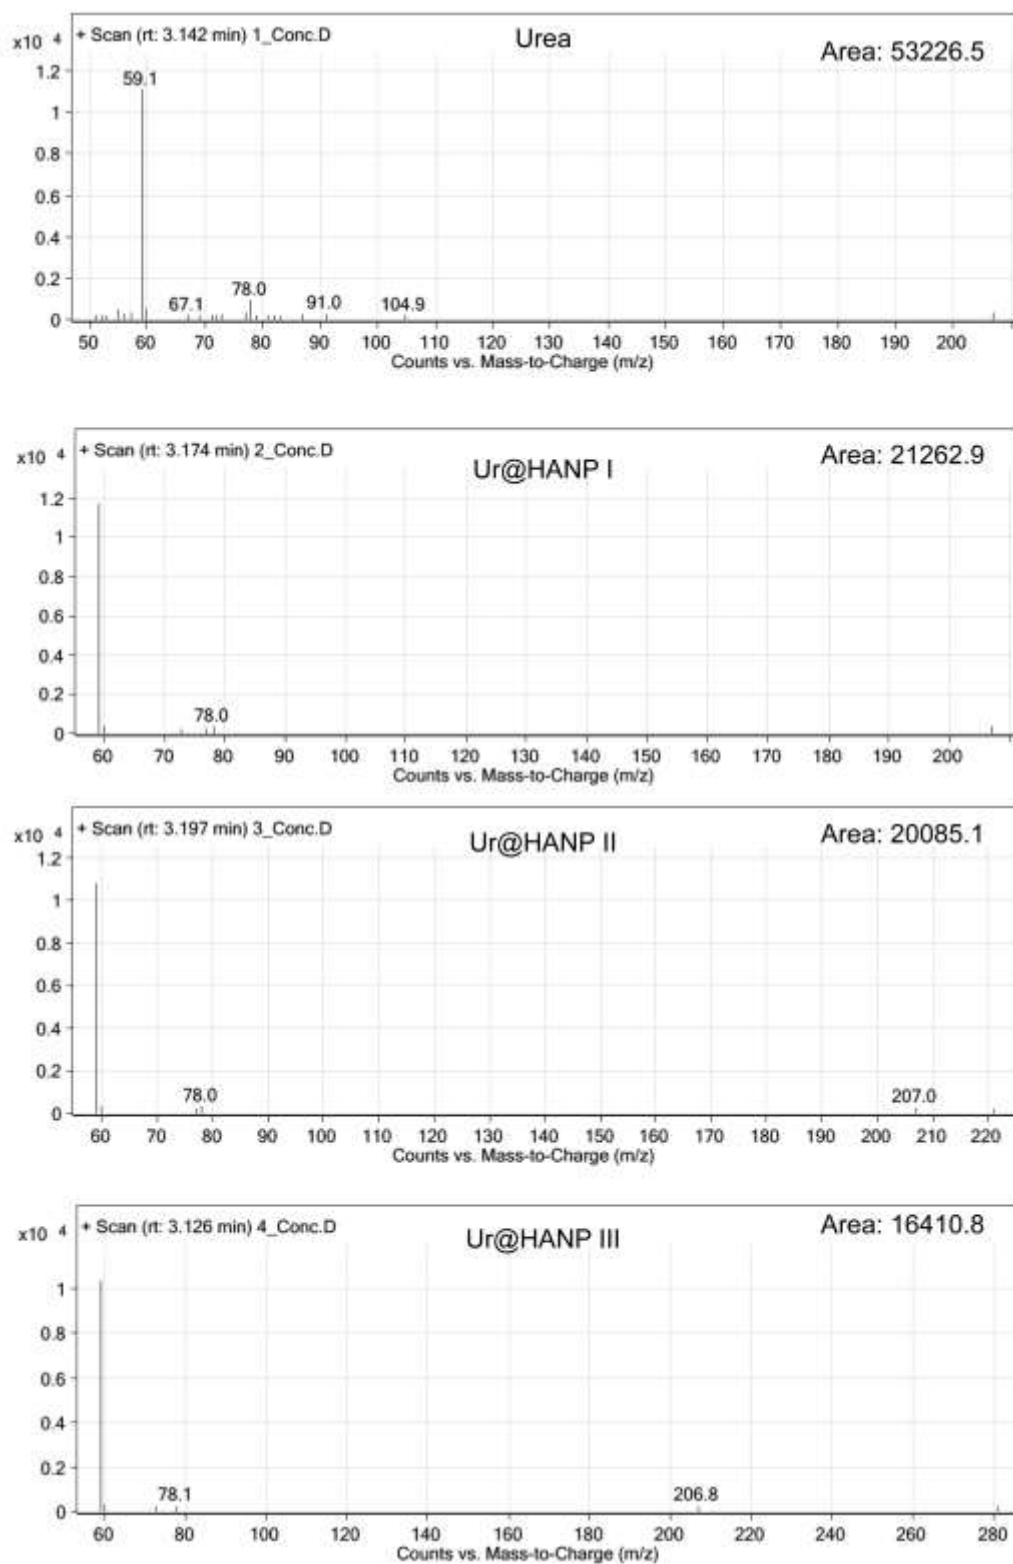

**Figure S12.** GCMS spectra of urea and urea loaded HANP

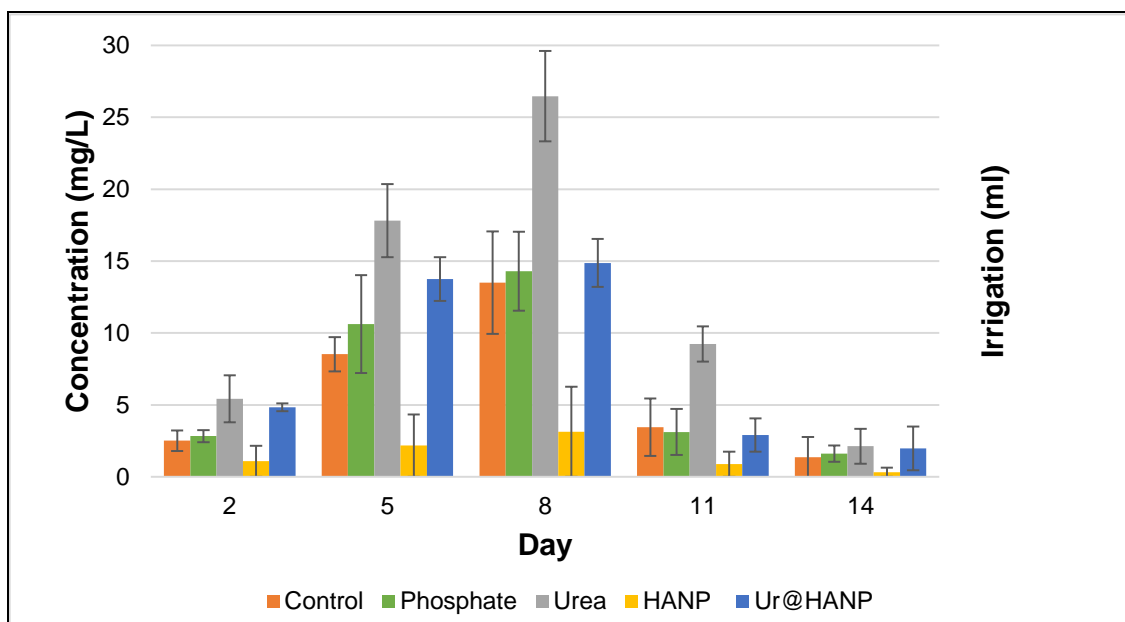

**Figure S13.** Nitrate concentrations in leachate samples of sand column experiment

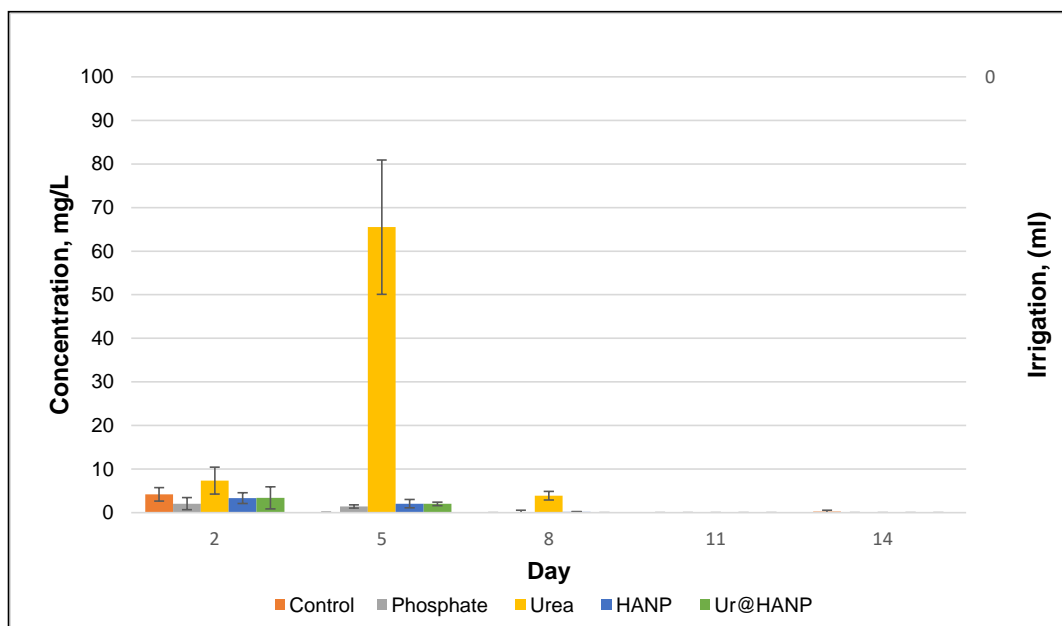

**Figure S14.** Ammonia concentrations in leachate samples of sand column experiment

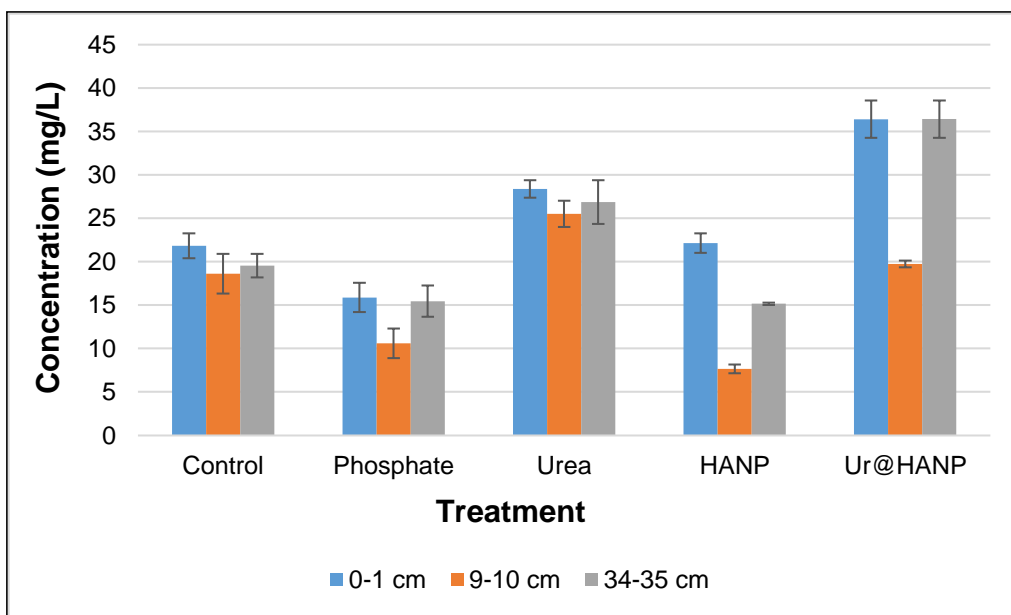

**Figure S15.** Distribution of total N at three different depths in the sand

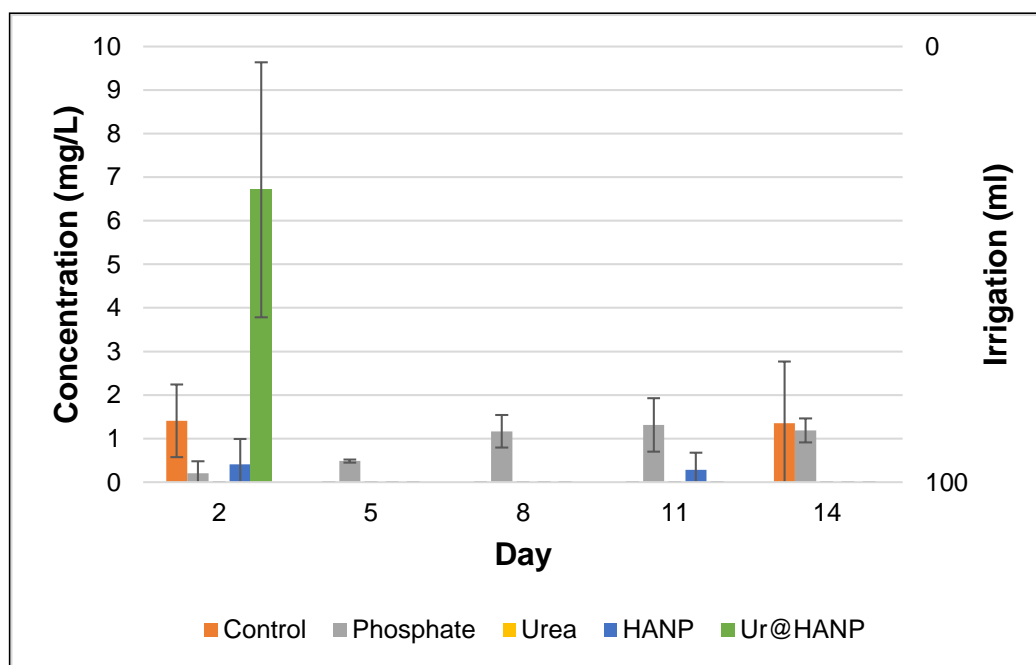

**Figure S16.** Ortho-P concentrations in the leachate samples of sand column experiment

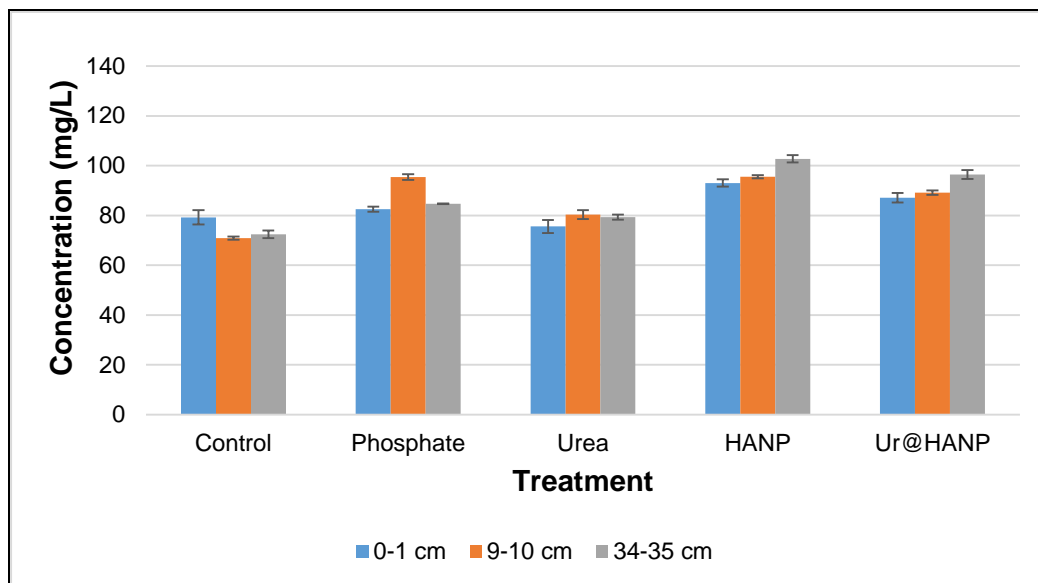

**Figure S17.** Distribution of total P at three different depths in the sand
